# Supplementary material for: Measurement of the proton spin structure at long distances
Source: Springer Nature journal article supplement (doi:10.1038/s41567-021-01198-z), 2021-04-12
Supplement: 41567_2021_1198_MOESM1_ESM.pdf [file 41567_2021_1198_MOESM1_ESM.pdf]

**Supplementary information**

---

**Measurement of the proton spin structure  
at long distances**

---

In the format provided by the  
authors and unedited

1 **I. SUPPLEMENTAL MATERIAL – FIGURE FOR RESULTS ON  $g_1^p$**

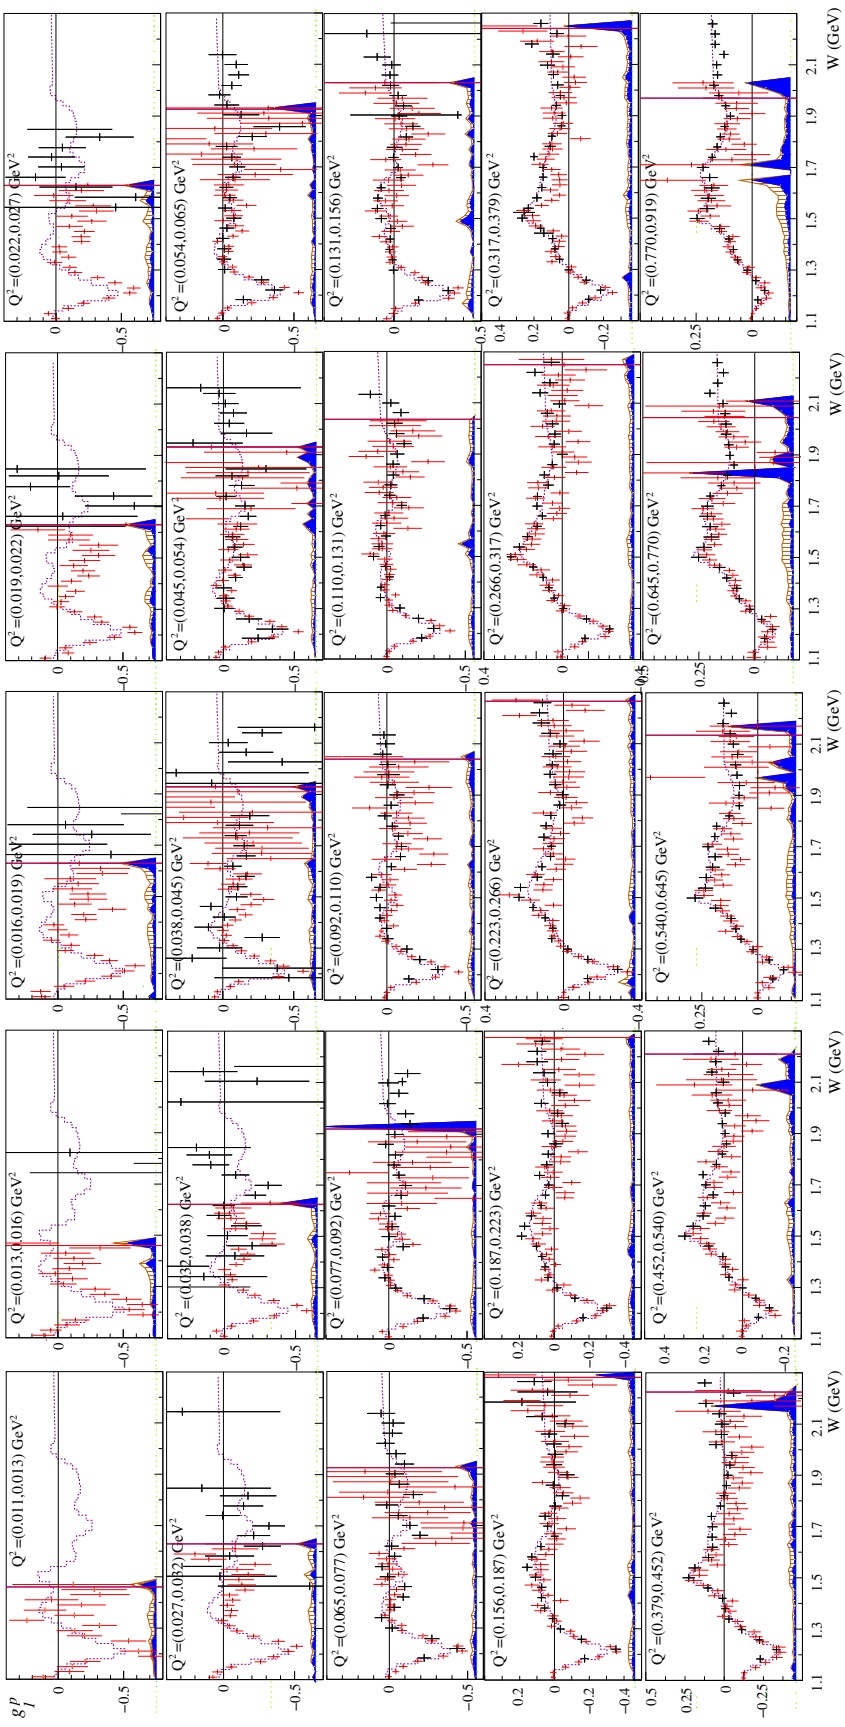

2 Results on  $g_1(Q^2, W)$  of the proton. Data from this work (red crosses) are plotted vs invariant mass  $W$ . The error bars are statistical. The blue  
3 solid and the brown hatched bands show the experimental and the parameterization uncertainties, respectively. The horizontal line is the zero of the  
4 vertical axis. The results are compared to a parameterization of previous world data (purple dotted curve) and results from a previous experiment carried  
5 out in Jefferson Lab's Hall B (black crosses, see Fersch, R. et al. (CLAS Collaboration). "Determination of the proton spin structure functions for  
6  $0.05 < Q^2 < 5 \text{ GeV}^2$  using CLAS." Phys. Rev. C **96**, 065208 (2017)). The corresponding error bars display the statistical and systematic uncertainties  
7 added in quadrature).
